# Supplementary material
Source: PubMed Central journal article supplement (PMC4030797)
Supplement: cn500019c_si_001.pdf [file cn500019c_si_001.pdf]

## Supporting Information

**Manuscript Title:** Interaction between Prion Protein and A $\beta$  Amyloid Fibrils Revisited

**Authors:** Krzysztof Nieznanski, Krystyna Surewicz, Shugui Chen, Hanna Nieznanska, Witold K. Surewicz

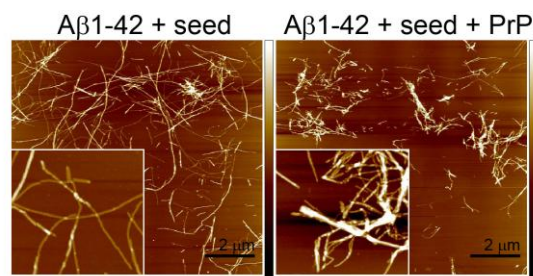

**Supplemental Figure S1.** AFM images of A $\beta$ 1-42 fibrils generated in the presence or absence of PrP in the reaction seeded with preformed A $\beta$ 1-42 fibrils. The samples were incubated for 24 h at the conditions described for experiments presented in Fig. 1. The final concentration of monomeric A $\beta$ 1-42, PrP and A $\beta$ 1-42 seeds was 10, 0.5 and 1  $\mu$ M, respectively. Fibrils used as seeds were presonicated. Insets show images at 5-fold higher magnification. The color coded bars illustrate the height scale in the range between 0 nm (darkest color) and 20 nm (white color).

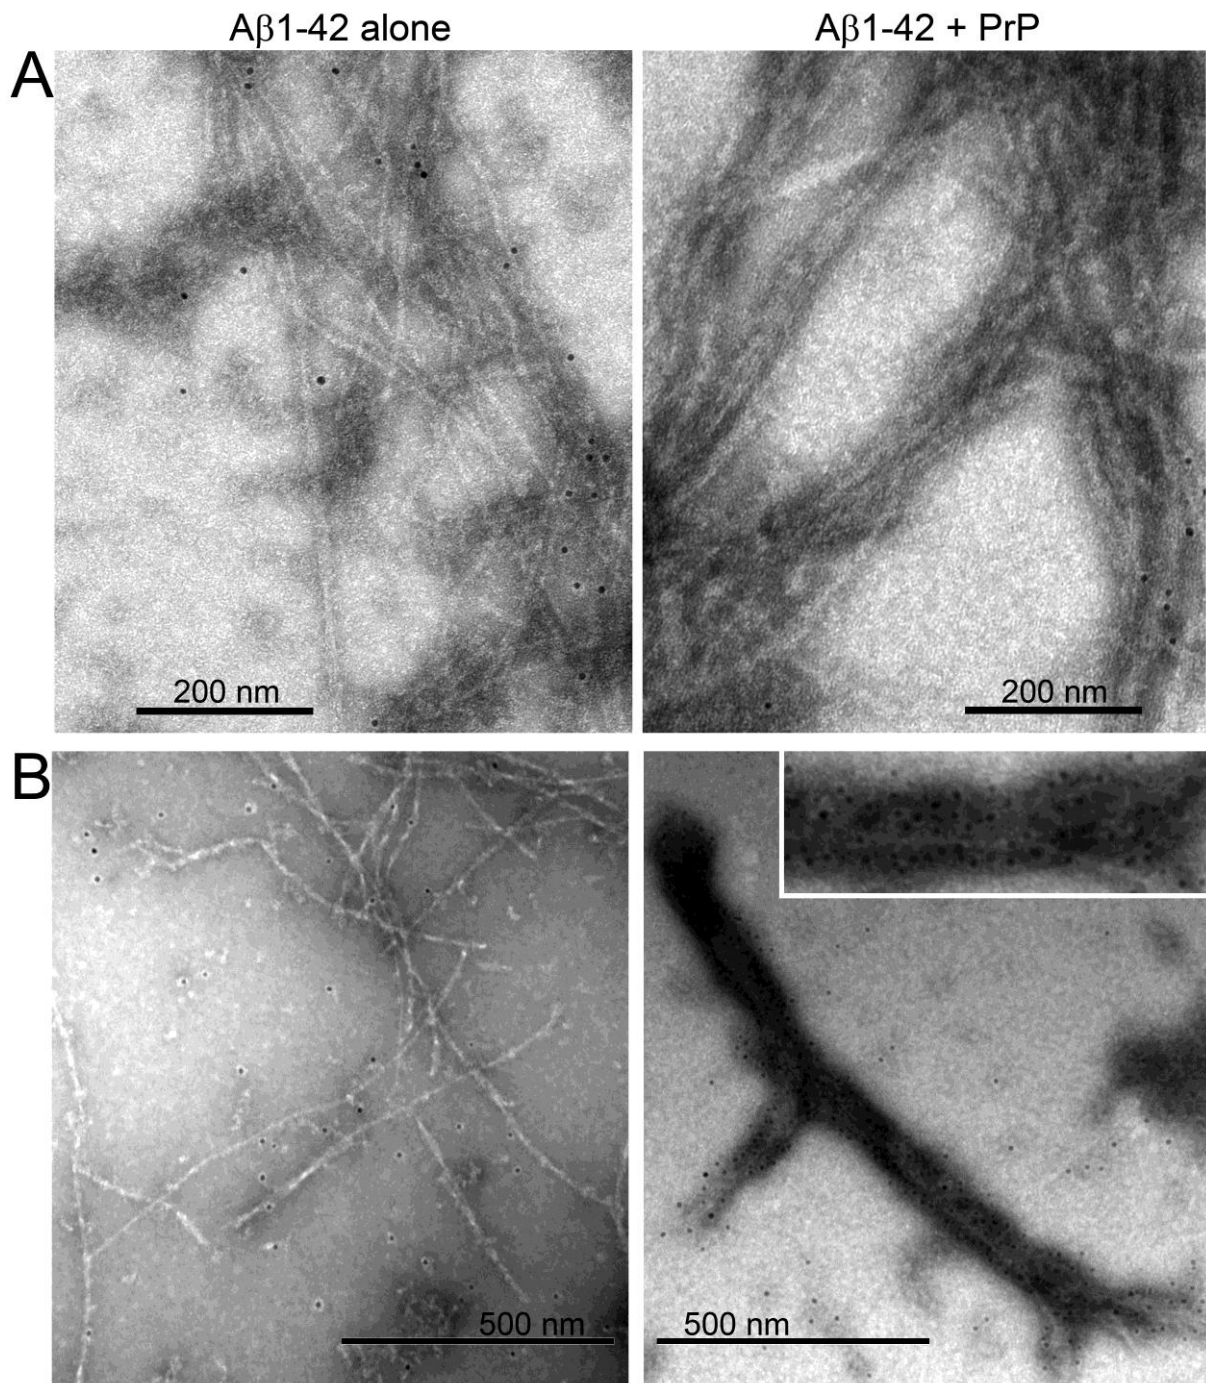

**Supplemental Figure S2.** Interaction between PrP and mature A $\beta$ 1-42 fibrils as evidenced by TEM. (A) Micrographs showing fibril bundling upon addition of PrP. Particles of colloidal gold (without primary antibodies) were added to document identical magnification of micrographs in the absence and presence of PrP. (B) Immuno-gold labeling of antibodies against His-tagged PrP reveal decoration of A $\beta$ 1-42 fibrils with PrP along the entire fibril length. Inset shows a magnified fragment of the image of decorated fibrils.

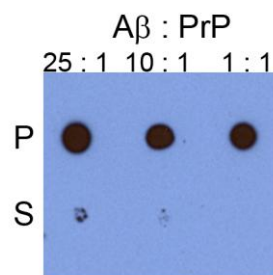

**Supplemental Figure S3.** Sedimentation of fibrillar A $\beta$ 1-42 in the presence of PrP. A $\beta$ 1-42 fibrils (20  $\mu$ M) were incubated with increasing concentrations of PrP (A $\beta$  : PrP molar ratios as indicated) and centrifuged under the conditions described for experiments presented in Figures 2 and 4. The pellets (resuspended in the initial volume of the sample) and supernatants were spotted onto nitrocellulose and analyzed with 1,000-fold diluted mouse mAb BAM-10 against A $\beta$  (Sigma) and subsequently with 5,000-fold diluted HRP-conjugated goat Ab against mouse IgG. Symbols P and S refer to pellet and supernatant, respectively.

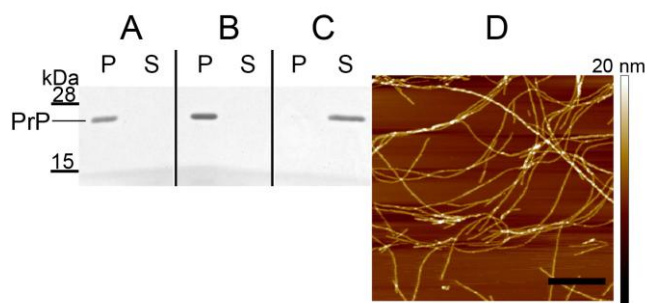

**Supplemental Figure S4.** Cosedimentation of PrP with A $\beta$ 1-40 fibrils. PrP (2  $\mu$ M) was incubated in the absence or presence of intact A $\beta$ 1-40 fibrils or fibrils fragmented by sonication (50  $\mu$ M in each case). The samples were subsequently centrifuged under the conditions allowing sedimentation of A $\beta$  fibrils, and the pellets and supernatants were analyzed by SDS-PAGE. (A) PrP preincubated with intact A $\beta$ 1-40 fibrils; (B) PrP preincubated with fragmented A $\beta$ 1-40 fibrils; (C) PrP alone. Symbols P and S refer to pellet and supernatant, respectively. (D) AFM image of intact A $\beta$ 1-40 fibrils. The scale bar represents 0.8  $\mu$ m.
